# Supplementary material
Source: PubMed Central journal article supplement (PMC4568079)
Supplement: NIHMS589610-supplement-Appendix_2.pdf [file NIHMS589610-supplement-Appendix_2.pdf]

# COMMONLY USED REAGENTS AND EQUIPMENT

## BUFFERS AND STOCK SOLUTIONS

This collection describes the preparation of buffers and reagents used in the manipulation of nucleic acids and proteins (see Table A.2.1). When preparing solutions, use deionized, distilled water and reagents of the highest grade available. Sterilization—by filtration through a 0.22- $\mu\text{m}$  filter or by autoclaving—is recommended for most applications. Recipes for the following can be found elsewhere in the manual: culture media (UNIT 1.1), antibiotics (Table 1.4.1), lactose analogs (Table 1.4.2), and enzyme buffers (UNIT 3.4).

**CAUTION:** *Handle strong acids and bases carefully.*

**Table A.2.1** Molarities and Specific Gravities of Concentrated Acids and Bases

| Acid/base             | Molecular weight | % by weight | Molarity (approx.) | 1 M solution (ml/liter) | Specific gravity |
|-----------------------|------------------|-------------|--------------------|-------------------------|------------------|
| <i>Acids</i>          |                  |             |                    |                         |                  |
| Acetic acid (glacial) | 60.05            | 99.6        | 17.4               | 57.5                    | 1.05             |
| Formic acid           | 46.03            | 90          | 23.6               | 42.4                    | 1.205            |
|                       |                  | 98          | 25.9               | 38.5                    | 1.22             |
| Hydrochloric acid     | 36.46            | 36          | 11.6               | 85.9                    | 1.18             |
| Nitric acid           | 63.01            | 70          | 15.7               | 63.7                    | 1.42             |
| Perchloric acid       | 100.46           | 60          | 9.2                | 108.8                   | 1.54             |
|                       |                  | 72          | 12.2               | 82.1                    | 1.70             |
| Phosphoric acid       | 98.00            | 85          | 14.7               | 67.8                    | 1.70             |
| Sulfuric acid         | 98.07            | 98          | 18.3               | 54.5                    | 1.835            |
| <i>Bases</i>          |                  |             |                    |                         |                  |
| Ammonium hydroxide    | 35.0             | 28          | 14.8               | 67.6                    | 0.90             |
| Potassium hydroxide   | 56.11            | 45          | 11.6               | 82.2                    | 1.447            |
| Potassium hydroxide   | 56.11            | 50          | 13.4               | 74.6                    | 1.51             |
| Sodium hydroxide      | 40.0             | 50          | 19.1               | 52.4                    | 1.53             |

### ***Acid precipitation solution***

1 M HCl

0.1 M sodium pyrophosphate

*Nucleic acids can also be precipitated with a 10% (w/v) solution of trichloroacetic acid (TCA); however, this recipe is cheaper, easier to prepare, and just as efficient.*

### ***Ammonium acetate, 10 M***

Dissolve 385.4 g ammonium acetate in 150 ml H<sub>2</sub>O

Add H<sub>2</sub>O to 500 ml

### ***BBS (BES-buffered solution), 2×***

50 mM *N,N*-bis(2-hydroxyethyl)-2-aminoethanesulfonic acid (BES; Calbiochem)

280 mM NaCl

1.5 mM Na<sub>2</sub>HPO<sub>4</sub>, pH 6.95

800 ml H<sub>2</sub>O

Adjust pH to 6.95 with room temperature 1 M NaOH

H<sub>2</sub>O to 1 liter

*continued*

**Contributed by David D. Moore**

*Current Protocols in Molecular Biology* (1996) A.2.1-A..2.8

Copyright © 2000 by John Wiley & Sons, Inc.

Filter sterilize through a 0.45- $\mu$ m nitrocellulose filter (Nalgene)  
Store in aliquots at  $-20^{\circ}\text{C}$  (can be frozen and thawed repeatedly)

*The pH of this solution is critical (pH 6.95 to 6.98). When a new batch of 2 $\times$  BES buffer is prepared, its pH should be checked against a reference stock prepared (and tested) earlier.*

**CaCl<sub>2</sub>, 1 M**

147 g CaCl<sub>2</sub>·2H<sub>2</sub>O  
H<sub>2</sub>O to 1 liter

**Denhardt solution, 100 $\times$**

10 g Ficoll 400  
10 g polyvinylpyrrolidone  
10 g bovine serum albumin (Pentax Fraction V; Miles Laboratories)  
H<sub>2</sub>O to 500 ml  
Filter sterilize and store at  $-20^{\circ}\text{C}$  in 25-ml aliquots

**Dithiothreitol (DTT), 1 M**

Dissolve 15.45 g DTT in 100 ml H<sub>2</sub>O  
Store at  $-20^{\circ}\text{C}$

**EDTA (ethylenediamine tetraacetic acid), 0.5 M (pH 8.0)**

Dissolve 186.1 g Na<sub>2</sub>EDTA·2H<sub>2</sub>O in 700 ml H<sub>2</sub>O  
Adjust pH to 8.0 with 10 M NaOH (~50 ml)  
Add H<sub>2</sub>O to 1 liter

**Ethidium bromide, 10 mg/ml**

Dissolve 0.2 g ethidium bromide in 20 ml H<sub>2</sub>O  
Mix well and store at 4 $^{\circ}\text{C}$  in dark

CAUTION: *Ethidium bromide is a mutagen and must be handled carefully.*

**HBSS (Hanks balanced salt solution)**

5.4 mM KCl  
0.3 mM Na<sub>2</sub>HPO<sub>4</sub>  
0.4 mM KH<sub>2</sub>PO<sub>4</sub>  
4.2 mM NaHCO<sub>3</sub>  
1.3 mM CaCl<sub>2</sub>  
0.5 mM MgCl<sub>2</sub>  
0.6 mM MgSO<sub>4</sub>  
137 mM NaCl  
5.6 mM D-glucose  
0.02% phenol red (optional)  
Add H<sub>2</sub>O to 1 liter and adjust pH to 7.4

*HBSS can be purchased from Biofluids or Whittaker.*

*HBSS may be made or purchased without CaCl<sub>2</sub> and MgCl<sub>2</sub>. These are optional components that usually have no effect on an experiment. In some cases, however, their presence may be detrimental to a procedure. Consult the individual protocol to see if the presence or absence of these components is recommended in the materials list.*

**HCl, 1 M**

Mix in the following order:  
913.8 ml H<sub>2</sub>O  
86.2 ml concentrated HCl

**HeBS (HEPES-buffered saline) solution, 2×**

16.4 g NaCl

11.9 g HEPES acid

0.21 g Na<sub>2</sub>HPO<sub>4</sub>800 ml H<sub>2</sub>O

Titrate to pH 7.05 with 5 M NaOH

Add H<sub>2</sub>O to 1 literFilter sterilize through a 0.45- $\mu$ m nitrocellulose filter

Test for transfection efficiency and store at -20°C in 50-ml aliquots

*An exact pH is extremely important for efficient transfection. The optimal pH range is 7.05 to 7.12.*

**KCl, 1 M**

74.6 g KCl

H<sub>2</sub>O to 1 liter**MgCl<sub>2</sub>, 1 M**20.3 g MgCl<sub>2</sub>·6H<sub>2</sub>OH<sub>2</sub>O to 100 ml**MgSO<sub>4</sub>, 1 M**24.6 g MgSO<sub>4</sub>·7H<sub>2</sub>OH<sub>2</sub>O to 100 ml**MOPS buffer**0.2 M MOPS [3-(*N*-morpholino)propanesulfonic acid], pH 7.0

0.5 M sodium acetate

0.01 M EDTA

*Store in the dark and discard if it turns yellow.*

**NaCl, 5 M**

292 g NaCl

H<sub>2</sub>O to 1 liter**NaOH, 10 M**Dissolve 400 g NaOH in 450 ml H<sub>2</sub>OAdd H<sub>2</sub>O to 1 liter**PBS (phosphate-buffered saline)***10×* stock solution, 1 liter:

80 g NaCl

2 g KCl

11.5 g Na<sub>2</sub>HPO<sub>4</sub>·7H<sub>2</sub>O2 g KH<sub>2</sub>PO<sub>4</sub>*Working solution, pH ~7.3:*

137 mM NaCl

2.7 mM KCl

4.3 mM Na<sub>2</sub>HPO<sub>4</sub>·7H<sub>2</sub>O1.4 mM KH<sub>2</sub>PO<sub>4</sub>**Potassium acetate buffer, 0.1 M***Solution A:* 11.55 ml glacial acetic acid/liter (0.2 M).*Solution B:* 19.6 g potassium acetate (KC<sub>2</sub>H<sub>3</sub>O<sub>2</sub>)/liter (0.2 M).

Referring to Table A.2.2 for desired pH, mix the indicated volumes of solutions A and B, then dilute with H<sub>2</sub>O to 100 ml.

*This may be made as a 5- or 10-fold concentrate by scaling up the amount of potassium acetate in the same volume. Acetate buffers show concentration-dependent pH changes, so check concentrate pH by diluting an aliquot to the final concentration.*

*To prepare buffers with pH intermediate between the points listed in Table A.2.2, prepare closest higher pH, then titrate with solution A.*

**Table A.2.2** Preparation of 0.1 M Sodium and Potassium Acetate Buffers<sup>a</sup>

| Desired pH | Solution A (ml) | Solution B (ml) |
|------------|-----------------|-----------------|
| 3.6        | 46.3            | 3.7             |
| 3.8        | 44.0            | 6.0             |
| 4.0        | 41.0            | 9.0             |
| 4.2        | 36.8            | 13.2            |
| 4.4        | 30.5            | 19.5            |
| 4.6        | 25.5            | 24.5            |
| 4.8        | 20.0            | 30.0            |
| 5.0        | 14.8            | 35.2            |
| 5.2        | 10.5            | 39.5            |
| 5.4        | 8.8             | 41.2            |
| 5.6        | 4.8             | 45.2            |

<sup>a</sup>Adapted by permission from CRC (1975).**Potassium phosphate buffer, 0.1 M***Solution A:* 27.2 g KH<sub>2</sub>PO<sub>4</sub> per liter (0.2 M).*Solution B:* 34.8 g K<sub>2</sub>HPO<sub>4</sub> per liter (0.2 M).Referring to Table A.2.3 for desired pH, mix the indicated volumes of solutions A and B, then dilute with H<sub>2</sub>O to 200 ml.*This may be made as a 5- or 10-fold concentrate by scaling up the amount of potassium phosphate in the same volume. Phosphate buffers show concentration-dependent pH changes, so check concentrate pH by diluting an aliquot to the final concentration.***Table A.2.3** Preparation of 0.1 M Sodium and Potassium Phosphate Buffers<sup>a</sup>

| Desired pH | Solution A (ml) | Solution B (ml) | Desired pH | Solution A (ml) | Solution B (ml) |
|------------|-----------------|-----------------|------------|-----------------|-----------------|
| 5.7        | 93.5            | 6.5             | 6.9        | 45.0            | 55.0            |
| 5.8        | 92.0            | 8.0             | 7.0        | 39.0            | 61.0            |
| 5.9        | 90.0            | 10.0            | 7.1        | 33.0            | 67.0            |
| 6.0        | 87.7            | 12.3            | 7.2        | 28.0            | 72.0            |
| 6.1        | 85.0            | 15.0            | 7.3        | 23.0            | 77.0            |
| 6.2        | 81.5            | 18.5            | 7.4        | 19.0            | 81.0            |
| 6.3        | 77.5            | 22.5            | 7.5        | 16.0            | 84.0            |
| 6.4        | 73.5            | 26.5            | 7.6        | 13.0            | 87.0            |
| 6.5        | 68.5            | 31.5            | 7.7        | 10.5            | 90.5            |
| 6.6        | 62.5            | 37.5            | 7.8        | 8.5             | 91.5            |
| 6.7        | 56.5            | 43.5            | 7.9        | 7.0             | 93.0            |
| 6.8        | 51.0            | 49.0            | 8.0        | 5.3             | 94.7            |

<sup>a</sup>Adapted by permission from CRC (1975).

***SDS electrophoresis buffer, 5×***

15.1 g Tris base  
72.0 g glycine  
5.0 g SDS  
H<sub>2</sub>O to 1000 ml  
Dilute to 1× or 2× for working solution, as appropriate  
Store up to 1 month at 0° to 4°C

*Do not adjust the pH of the stock solution, as the solution is pH 8.3 when diluted.*

***SED (standard enzyme diluent)***

20 mM Tris·Cl, pH 7.5  
500 µg/ml bovine serum albumin (Pentax Fraction V)  
10 mM 2-mercaptoethanol  
Store up to 1 month at 4°C

***Sodium acetate, 3 M***

Dissolve 408 g sodium acetate·3H<sub>2</sub>O in 800 ml H<sub>2</sub>O  
Add H<sub>2</sub>O to 1 liter  
Adjust pH to 4.8 or 5.2 (as desired) with 3 M acetic acid

***Sodium acetate buffer, 0.1 M***

*Solution A:* 11.55 ml glacial acetic acid/liter (0.2 M).  
*Solution B:* 27.2 g sodium acetate (NaC<sub>2</sub>H<sub>3</sub>O<sub>2</sub>·3H<sub>2</sub>O)/liter (0.2 M).  
Referring to Table A.2.2 for desired pH, mix the indicated volumes of solutions A and B, then dilute with H<sub>2</sub>O to 100 ml. (See Potassium acetate buffer recipe for further details.)

***Sodium phosphate buffer, 0.1 M***

*Solution A:* 27.6 g NaH<sub>2</sub>PO<sub>4</sub>·H<sub>2</sub>O per liter (0.2 M).  
*Solution B:* 53.65 g Na<sub>2</sub>HPO<sub>4</sub>·7H<sub>2</sub>O per liter (0.2 M).  
Referring to Table A.2.3 for desired pH, mix the indicated volumes of solutions A and B, then dilute with H<sub>2</sub>O to 200 ml. (See Potassium phosphate buffer recipe for further details.)

***SSC (sodium chloride/sodium citrate), 20×***

3 M NaCl (175 g/liter)  
0.3 M Na<sub>3</sub>citrate·2H<sub>2</sub>O (88 g/liter)  
Adjust pH to 7.0 with 1 M HCl

***STE buffer***

10 mM Tris·Cl, pH 7.5  
10 mM NaCl  
1 mM EDTA, pH 8.0

***TAE (Tris/acetate/EDTA) electrophoresis buffer***

|                                               |                                             |
|-----------------------------------------------|---------------------------------------------|
| <i>50× stock solution:</i>                    | <i>Working solution, pH ~8.5:</i>           |
| 242 g Tris base                               | 40 mM Tris·acetate                          |
| 57.1 ml glacial acetic acid                   | 2 mM Na <sub>2</sub> EDTA·2H <sub>2</sub> O |
| 37.2 g Na <sub>2</sub> EDTA·2H <sub>2</sub> O |                                             |
| H <sub>2</sub> O to 1 liter                   |                                             |

***TBE (Tris/borate/EDTA) electrophoresis buffer***

*10× stock solution, 1 liter:*  
108 g Tris base (890 mM)  
55 g boric acid (890 mM)  
40 ml 0.5 M EDTA, pH 8.0 (see recipe; 20 mM)

**TE (Tris/EDTA) buffer**

10 mM Tris·Cl, pH 7.4, 7.5, or 8.0 (or other pH; see recipe)  
1 mM EDTA, pH 8.0

**TEA (triethanolamine) solution**

50 mM triethanolamine, pH ~11.5  
0.1% Triton X-100  
0.15 M NaCl

*Add Triton X-100 as a 10% stock sterilized by Millipore filtration and stored in the dark to prevent photooxidation (stock is stable 5 years at room temperature).*

**TEN (Tris/EDTA/NaCl) solution**

40 mM Tris·Cl, pH 7.5  
1 mM EDTA, pH 8.0  
150 mM NaCl  
Store up to 6 months at room temperature

**TM buffer, 10×**

100 mM Tris·Cl, pH 8.0  
100 mM MgCl<sub>2</sub>

**Tris-buffered saline (TBS)**

100 mM Tris·Cl, pH 7.5  
0.9% (150 mM) NaCl  
Store up to several months at 4°C

**Tris·Cl [tris(hydroxymethyl)aminomethane], 1 M**

Dissolve 121 g Tris base in 800 ml H<sub>2</sub>O  
Adjust to desired pH with concentrated HCl  
Mix and add H<sub>2</sub>O to 1 liter

*Approximately 70 ml of HCl is needed to achieve a pH 7.4 solution, and approximately 42 ml for a solution that is pH 8.0.*

**IMPORTANT NOTE:** *The pH of Tris buffers changes significantly with temperature, decreasing approximately 0.028 pH units per 1°C. Tris-buffered solutions should be adjusted to the desired pH at the temperature at which they will be used. Because the pK<sub>a</sub> of Tris is 8.08, Tris should not be used as a buffer below pH ~7.2 or above pH ~9.0.*

**TTBS (Tween 20/TBS)**

0.1% Tween 20 in Tris-buffered saline (TBS; see recipe)  
Store up to several months at 4°C

**EQUIPMENT**

Special equipment is also itemized in the materials list of each protocol. We have not attempted to list all items required for each procedure, but rather have noted those items that might not be readily available in the laboratory or that require special preparation. Listed below are standard pieces of equipment in the modern molecular biology laboratory, i.e., items used extensively in this manual and thus not included in the individual materials lists.

**Autoclave**

**Balances**, analytical and preparative

**Bench protectors**, plastic-backed (including “blue pads”)

**Centrifuges** a low-speed (20,000 rpm) refrigerated centrifuge and an ultracentrifuge (20,000 to 80,000 rpm) are required for many procedures. Vertical ultracentrifuge rotors are very convenient for preparing plasmid DNA. At least one microcentrifuge that holds stan-

dard 1.5-ml microcentrifuge tubes is essential. It is also useful to have a large-capacity, low-speed centrifuge (such as the Beckman J-6M) for spinning down large bacterial cultures and a tabletop swinging-bucket centrifuge with adapters for spinning 96-well microtiter plates.

NOTE: *Centrifuge speeds are provided as  $\times g$  or as rpm (with example rotor models) throughout the manual. Readers should consult the nomograms in APPENDIX 1G to convert these speeds to their own rotor models.*

**Computer (PC or Macintosh) and printer**

**Darkroom and developing tanks** or X-Omat automatic X-ray film developer.

**Dry ice**

**Filtration apparatus** for collecting acid precipitates on nitrocellulose filters or membrane.

**Flasks**, glass (e.g., Erlenmeyer, Florence)

**Fraction collector**

**Freezers and refrigerators** for 4°, -20°, and -70°C incubation and storage.

**Fume hood**

**Geiger counter**

**Gel dryer**

**Gel electrophoresis equipment** at least one full-size horizontal apparatus and one horizontal minigel apparatus, two sequencing gel setups for each person engaged in large-scale sequencing projects, one vertical gel apparatus for polyacrylamide protein gels, and specialized equipment for two-dimensional protein gels as required.

**Heating blocks** thermostat-controlled metal heating blocks that hold test tubes and/or microcentrifuge tubes are very convenient for carrying out enzymatic reactions.

**Ice maker**

**Incubator** (37°C) for growing bacteria. We recommend an incubator large enough to hold a “tissue culture” roller drum that can be used to grow 5-ml cultures in standard 18  $\times$  150 mm test tubes. A convenient and durable tube roller is made by New Brunswick Scientific.

**Incubator/shaker(s)** an enclosed shaker (such as the New Brunswick Controlled Environment Incubator Shaker) that can spin 4-liter flasks is essential for growing 1-liter *E. coli* cultures. A rotary shaking water bath (New Brunswick R76) is useful for growing smaller cultures in flasks.

**Light box** for viewing autoradiograms.

**Liquid nitrogen**

**Magnetic stirrers** (with heater is useful).

**Microcentrifuge**, Eppendorf-type, maximum speed 12,000 to 14,000 rpm

**Microcentrifuge tubes**, 1.5-ml

**Microwave oven** to melt agar and agarose.

**Mortar and pestle**

**Paper cutter** large size, for 46 cm  $\times$  57 cm Whatman sheets.

**Paper towels**

**Parafilm**

**Pasteur pipets and bulbs**

**PCR machine** (Perkin-Elmer or MJ Research)

**pH meter**

**pH paper**

**Pipettors** that use disposable tips and dispense 1 to 1000  $\mu$ l. It is best to have a set for each full-time researcher.

**Plastic wrap** (e.g., Saran Wrap)

**Polaroid camera and UV transilluminator** for taking photographs of stained gels.

**Policemen**, rubber or plastic

**Power supplies** 300-volt power supplies are sufficient for agarose gels; 2000-volt power supply required for DNA sequencing.

**Racks**, test tube

**Radiation shield** (Lucite or Plexiglas)

**Radioactive ink**

**Radioactive waste containers**, for liquid and solid waste

**Refrigerator**, 4°C

**Safety glasses**

**Scalpels and blades**

**Scintillation counter**

**Scissors**

**Seal-A-Meal bag sealer** or equivalent

**Shakers**, orbital and platform, room temperature or 37°C

**Spectrophotometer** UV and visible

**Speedvac evaporator** (Savant)

**Tissue culture equipment** CO<sub>2</sub> incubator, phase contrast microscope, liquid nitrogen storage container, and laminar flow hood.

**UV cross-linker** (e.g., Stratalinker, Stratagene)

**UV light sources**, long- and short-wave

*UV transilluminator*

*Vacuum desiccator/lyophilizer*

*Vacuum oven*

*Vortex mixers*

*Water baths* at least two with 80°C capacity

*Water purification equipment* or glass distillation apparatus to purify all water used in molecular biology experiments.

*X-ray film cassettes and intensifying screens*

## LITERATURE CITED

Chemical Rubber Company (CRC). 1975. CRC Handbook of Biochemistry and Molecular Biology, Physical and Chemical Data, 3rd ed., Vol. 1. CRC Press, Boca Raton, Fla.

---

Contributed by David D. Moore  
Massachusetts General Hospital & Harvard Medical School  
Boston, Massachusetts
